# Supplementary material for: miR-155-5p Implicates in the Pathogenesis of Renal Fibrosis via Targeting SOCS1 and SOCS6
Source: Oxid Med Cell Longev. 2020 Jun 6;2020:6263921. doi: 10.1155/2020/6263921 (PMC7298347; doi:10.1155/2020/6263921)
Supplement: Supplementary Materials — The statistic test results of Figure 3, indicating the significance of each panel. [file 6263921.f1.xlsx]

## Sheet: Fig3B
	Table Analyzed	Fig3B		Table Analyzed	Fig3B		Table Analyzed	Fig3B		Table Analyzed	Fig3B		Table Analyzed	Fig3B		Table Analyzed	Fig3B		Table Analyzed	Fig3B		Table Analyzed	Fig3B		Table Analyzed	Fig3B
	Column B	Data Set-B		Column D	Data Set-D		Column F	Data Set-F		Column H	Data Set-H		Column J	Data Set-J		Column L	Data Set-L		Column L	Data Set-L		Column N	Data Set-N		Column P	Data Set-P
	vs.	vs.		vs.	vs.		vs.	vs.		vs.	vs.		vs.	vs.		vs.	vs.		vs.	vs.		vs.	vs.		vs.	vs.
	Column A	Data Set-A		Column C	Data Set-C		Column E	Data Set-E		Column G	Data Set-G		Column I	Data Set-I		Column K	Data Set-K		Column K	Data Set-K		Column M	Data Set-M		Column O	Data Set-O
	Unpaired t test			Unpaired t test			Unpaired t test			Unpaired t test			Unpaired t test			Unpaired t test			Unpaired t test			Unpaired t test			Unpaired t test
	P value	<0.0001		P value	0.073		P value	0.0785		P value	0.1041		P value	<0.0001		P value	0.6726		P value	0.6726		P value	<0.0001		P value	0.9893
	P value summary	****		P value summary	ns		P value summary	ns		P value summary	ns		P value summary	****		P value summary	ns		P value summary	ns		P value summary	****		P value summary	ns
	Significantly different (P < 0.05)?	Yes		Significantly different (P < 0.05)?	No		Significantly different (P < 0.05)?	No		Significantly different (P < 0.05)?	No		Significantly different (P < 0.05)?	Yes		Significantly different (P < 0.05)?	No		Significantly different (P < 0.05)?	No		Significantly different (P < 0.05)?	Yes		Significantly different (P < 0.05)?	No
	One- or two-tailed P value?	Two-tailed		One- or two-tailed P value?	Two-tailed		One- or two-tailed P value?	Two-tailed		One- or two-tailed P value?	Two-tailed		One- or two-tailed P value?	Two-tailed		One- or two-tailed P value?	Two-tailed		One- or two-tailed P value?	Two-tailed		One- or two-tailed P value?	Two-tailed		One- or two-tailed P value?	Two-tailed
	t, df	t=9.92 df=10		t, df	t=2.003 df=10		t, df	t=1.96 df=10		t, df	t=1.788 df=10		t, df	t=7.525 df=10		t, df	t=0.4352 df=10		t, df	t=0.4352 df=10		t, df	t=6.403 df=10		t, df	t=0.01379 df=10
	How big is the difference?			How big is the difference?			How big is the difference?			How big is the difference?			How big is the difference?			How big is the difference?			How big is the difference?			How big is the difference?			How big is the difference?
	Mean ± SEM of column A	1.112 ± 0.03162, n=6		Mean ± SEM of column C	0.9295 ± 0.07368, n=6		Mean ± SEM of column E	1.076 ± 0.09723, n=6		Mean ± SEM of column G	0.9274 ± 0.05421, n=6		Mean ± SEM of column I	1.069 ± 0.04966, n=6		Mean ± SEM of column K	1.121 ± 0.04703, n=6		Mean ± SEM of column K	1.121 ± 0.04703, n=6		Mean ± SEM of column M	1.017 ± 0.06363, n=6		Mean ± SEM of column O	1.082 ± 0.06012, n=6
	Mean ± SEM of column B	0.5565 ± 0.04627, n=6		Mean ± SEM of column D	1.141 ± 0.07588, n=6		Mean ± SEM of column F	0.8716 ± 0.03833, n=6		Mean ± SEM of column H	1.102 ± 0.08139, n=6		Mean ± SEM of column J	0.4683 ± 0.06255, n=6		Mean ± SEM of column L	1.069 ± 0.109, n=6		Mean ± SEM of column L	1.069 ± 0.109, n=6		Mean ± SEM of column N	0.5038 ± 0.04883, n=6		Mean ± SEM of column P	1.08 ± 0.08716, n=6
	Difference between means	-0.5559 ± 0.05604		Difference between means	0.2119 ± 0.1058		Difference between means	-0.2048 ± 0.1045		Difference between means	0.1748 ± 0.09779		Difference between means	-0.6009 ± 0.07986		Difference between means	-0.05165 ± 0.1187		Difference between means	-0.05165 ± 0.1187		Difference between means	-0.5136 ± 0.08021		Difference between means	-0.00146 ± 0.1059
	95% confidence interval	-0.6808 to -0.4311		95% confidence interval	-0.0238 to 0.4475		95% confidence interval	-0.4377 to 0.02806		95% confidence interval	-0.04308 to 0.3927		95% confidence interval	-0.7789 to -0.423		95% confidence interval	-0.3161 to 0.2128		95% confidence interval	-0.3161 to 0.2128		95% confidence interval	-0.6923 to -0.3349		95% confidence interval	-0.2374 to 0.2345
	R squared (eta squared)	0.9077		R squared (eta squared)	0.2863		R squared (eta squared)	0.2775		R squared (eta squared)	0.2422		R squared (eta squared)	0.8499		R squared (eta squared)	0.01859		R squared (eta squared)	0.01859		R squared (eta squared)	0.8039		R squared (eta squared)	1.901e-05
	F test to compare variances			F test to compare variances			F test to compare variances			F test to compare variances			F test to compare variances			F test to compare variances			F test to compare variances			F test to compare variances			F test to compare variances
	F, DFn, Dfd	2.141, 5, 5		F, DFn, Dfd	1.061, 5, 5		F, DFn, Dfd	6.436, 5, 5		F, DFn, Dfd	2.254, 5, 5		F, DFn, Dfd	1.587, 5, 5		F, DFn, Dfd	5.369, 5, 5		F, DFn, Dfd	5.369, 5, 5		F, DFn, Dfd	1.698, 5, 5		F, DFn, Dfd	2.102, 5, 5
	P value	0.4233		P value	0.95		P value	0.062		P value	0.3933		P value	0.6249		P value	0.0888		P value	0.0888		P value	0.5753		P value	0.4343
	P value summary	ns		P value summary	ns		P value summary	ns		P value summary	ns		P value summary	ns		P value summary	ns		P value summary	ns		P value summary	ns		P value summary	ns
	Significantly different (P < 0.05)?	No		Significantly different (P < 0.05)?	No		Significantly different (P < 0.05)?	No		Significantly different (P < 0.05)?	No		Significantly different (P < 0.05)?	No		Significantly different (P < 0.05)?	No		Significantly different (P < 0.05)?	No		Significantly different (P < 0.05)?	No		Significantly different (P < 0.05)?	No

## Sheet: Fig3C
		Table Analyzed	Fig3C		Table Analyzed	Fig3C		Table Analyzed	Fig3C
		Column B	Data Set-B		Column D	Data Set-D		Column F	Data Set-F
		vs.	vs.		vs.	vs.		vs.	vs.
		Column A	Data Set-A		Column C	Data Set-C		Column E	Data Set-E
		Unpaired t test			Unpaired t test			Unpaired t test
		P value	0.0016		P value	0.0595		P value	0.0002
		P value summary	**		P value summary	ns		P value summary	***
		Significantly different (P < 0.05)?	Yes		Significantly different (P < 0.05)?	No		Significantly different (P < 0.05)?	Yes
		One- or two-tailed P value?	Two-tailed		One- or two-tailed P value?	Two-tailed		One- or two-tailed P value?	Two-tailed
		t, df	t=4.29 df=10		t, df	t=2.126 df=10		t, df	t=5.589 df=10
		How big is the difference?			How big is the difference?			How big is the difference?
		Mean ± SEM of column A	1.009 ± 0.07946, n=6		Mean ± SEM of column C	1.038 ± 0.07061, n=6		Mean ± SEM of column E	1.091 ± 0.07229, n=6
		Mean ± SEM of column B	0.5022 ± 0.08756, n=6		Mean ± SEM of column D	0.8754 ± 0.02959, n=6		Mean ± SEM of column F	0.558 ± 0.06232, n=6
		Difference between means	-0.5073 ± 0.1182		Difference between means	-0.1627 ± 0.07656		Difference between means	-0.5334 ± 0.09544
		95% confidence interval	-0.7707 to -0.2438		95% confidence interval	-0.3333 to 0.007846		95% confidence interval	-0.746 to -0.3207
		R squared (eta squared)	0.6479		R squared (eta squared)	0.3112		R squared (eta squared)	0.7575
		F test to compare variances			F test to compare variances			F test to compare variances
		F, DFn, Dfd	1.214, 5, 5		F, DFn, Dfd	5.693, 5, 5		F, DFn, Dfd	1.346, 5, 5
		P value	0.8364		P value	0.0792		P value	0.7525
		P value summary	ns		P value summary	ns		P value summary	ns
		Significantly different (P < 0.05)?	No		Significantly different (P < 0.05)?	No		Significantly different (P < 0.05)?	No

## Sheet: Fig3D
	Table Analyzed	Fig3D		Table Analyzed	Fig3D		Table Analyzed	Fig3D
	Column B	Data Set-B		Column D	Data Set-D		Column F	Data Set-F
	vs.	vs.		vs.	vs.		vs.	vs.
	Column A	Data Set-A		Column C	Data Set-C		Column E	Data Set-E
	Unpaired t test			Unpaired t test			Unpaired t test
	P value	0.0171		P value	0.6408		P value	0.0051
	P value summary	*		P value summary	ns		P value summary	**
	Significantly different (P < 0.05)?	Yes		Significantly different (P < 0.05)?	No		Significantly different (P < 0.05)?	Yes
	One- or two-tailed P value?	Two-tailed		One- or two-tailed P value?	Two-tailed		One- or two-tailed P value?	Two-tailed
	t, df	t=2.856 df=10		t, df	t=0.481 df=10		t, df	t=3.564 df=10
	How big is the difference?			How big is the difference?			How big is the difference?
	Mean ± SEM of column A	0.8871 ± 0.07148, n=6		Mean ± SEM of column C	1.049 ± 0.09565, n=6		Mean ± SEM of column E	1.018 ± 0.05664, n=6
	Mean ± SEM of column B	0.6459 ± 0.04495, n=6		Mean ± SEM of column D	0.979 ± 0.1108, n=6		Mean ± SEM of column F	0.756 ± 0.0468, n=6
	Difference between means	-0.2411 ± 0.08444		Difference between means	-0.0704 ± 0.1464		Difference between means	-0.2619 ± 0.07347
	95% confidence interval	-0.4293 to -0.053		95% confidence interval	-0.3965 to 0.2557		95% confidence interval	-0.4256 to -0.09817
	R squared (eta squared)	0.4492		R squared (eta squared)	0.02262		R squared (eta squared)	0.5595
	F test to compare variances			F test to compare variances			F test to compare variances
	F, DFn, Dfd	2.528, 5, 5		F, DFn, Dfd	1.341, 5, 5		F, DFn, Dfd	1.464, 5, 5
	P value	0.3316		P value	0.7552		P value	0.6858
	P value summary	ns		P value summary	ns		P value summary	ns
	Significantly different (P < 0.05)?	No		Significantly different (P < 0.05)?	No		Significantly different (P < 0.05)?	No

## Sheet: Fig3E
	Table Analyzed	Fig3E			Table Analyzed	Fig3E
	Column B	TIF			Column D	TIF
	vs.	vs.			vs.	vs.
	Column A	ND			Column C	ND
	Unpaired t test				Unpaired t test
	P value	0.0037			P value	0.0002
	P value summary	**			P value summary	***
	Significantly different (P < 0.05)?	Yes			Significantly different (P < 0.05)?	Yes
	One- or two-tailed P value?	Two-tailed			One- or two-tailed P value?	Two-tailed
	t, df	t=3.113 df=34			t, df	t=4.156 df=34
	How big is the difference?				How big is the difference?
	Mean ± SEM of column A	0.9844 ± 0.06862, n=18			Mean ± SEM of column C	0.9289 ± 0.1096, n=18
	Mean ± SEM of column B	0.7094 ± 0.05561, n=18			Mean ± SEM of column D	0.4417 ± 0.04158, n=18
	Difference between means	-0.275 ± 0.08833			Difference between means	-0.4871 ± 0.1172
	95% confidence interval	-0.4545 to -0.0955			95% confidence interval	-0.7253 to -0.249
	R squared (eta squared)	0.2218			R squared (eta squared)	0.3369
	F test to compare variances				F test to compare variances
	F, DFn, Dfd	1.523, 17, 17			F, DFn, Dfd	6.947, 17, 17
	P value	0.3946			P value	0.0002
	P value summary	ns			P value summary	***
	Significantly different (P < 0.05)?	No			Significantly different (P < 0.05)?	Yes
